# Supplementary material for: NiFe-LDH/MXene nano-array hybrid architecture for exceptional capacitive lithium storage
Source: Royal Society of Chemistry journal article supplement (doi:10.1039/d2dt03024a), 2022-01-01
Supplement: d2dt03024a1.pdf [file d2dt03024a1.pdf]

## **Supporting Information**

### **Architecting NiFe-LDH/MXene nano-arrays hybrid toward exceptional capacitive lithium storage**

Jian Shen, Guangxu Yang, Guangbin Duan\*, Xi Guo, Li Li\*, Bingqiang

Cao

School of Materials Science and Engineering, University of Jinan, Jinan  
250022, Shandong, China

\*Corresponding authors at: School of Materials Science and Engineering,  
University of Jinan, Jinan 250022, PR China.

Tel.: +86 531 82765473; fax: +86 531 87974453.

E-mail addresses: mse\_lil@ujn.edu.cn (L. Li), mse\_duangb@ujn.edu.cn  
(G. Duan)

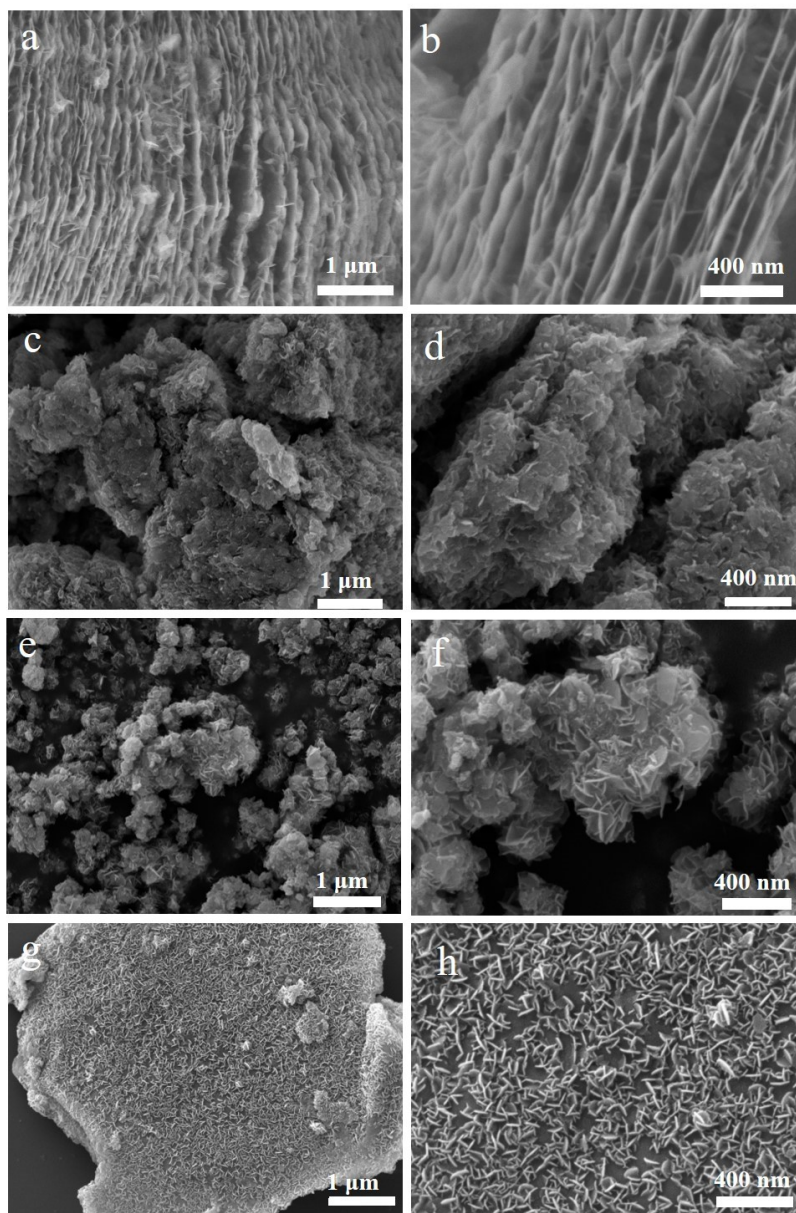

**Figure S1.** SEM images of (a-b)  $\text{Ti}_3\text{C}_2\text{T}_x$ -MXene, (c-d) NiFe-LDH, (e-f) NiFe-LDH /MXene-50, (g-h) NiFe-LDH /MXene-200.

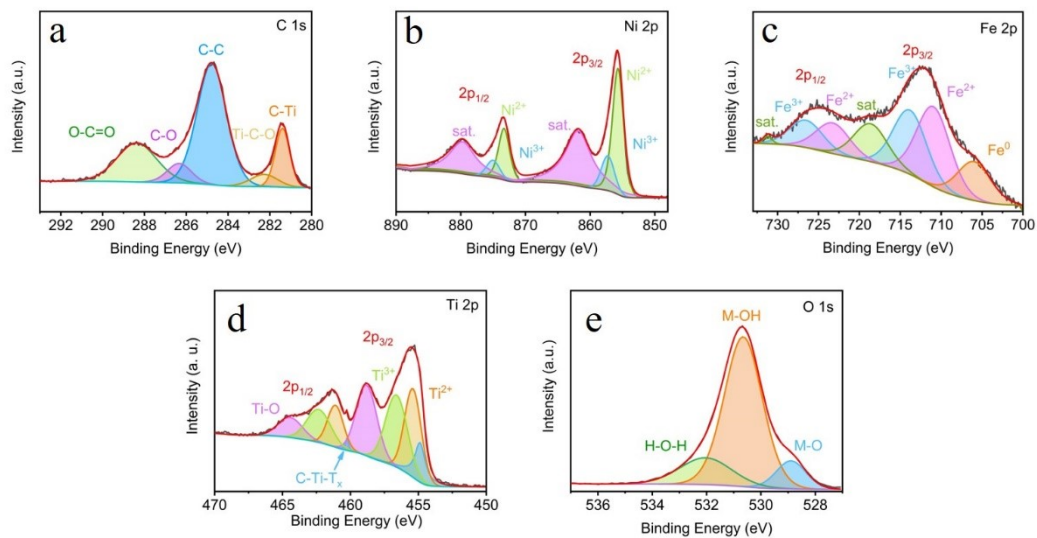

**Figure S2.** High-resolution XPS spectra of (a) C 1s, (b) Ni 2p, (c) Fe 2p, (d) Ti 2p, (e) O 1s for NiFe-LDH/MXene-500.

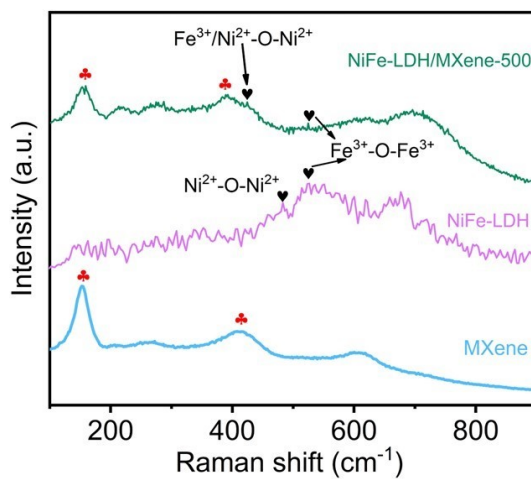

**Figure S3.** Raman spectra of NiFe-LDH, MXene and NiFe-LDH /MXene-500.

**Table S1.** The specific surface areas and total pore volumes of the samples.

| Electrode materials                                  | NiFe-LDH | NiFe-LDH/MXene | NiFe-LDH/MXene | NiFe-LDH/MXene | MXene  |
|------------------------------------------------------|----------|----------------|----------------|----------------|--------|
|                                                      |          | -50            | -200           | -500           |        |
| Specific surface area ( $\text{m}^2 \text{g}^{-1}$ ) | 223.3    | 77.77          | 54.98          | 41.07          | 2.04   |
| Total pore volume ( $\text{cm}^3 \text{g}^{-1}$ )    | 0.439    | 0.2908         | 0.1691         | 0.1305         | 0.0181 |

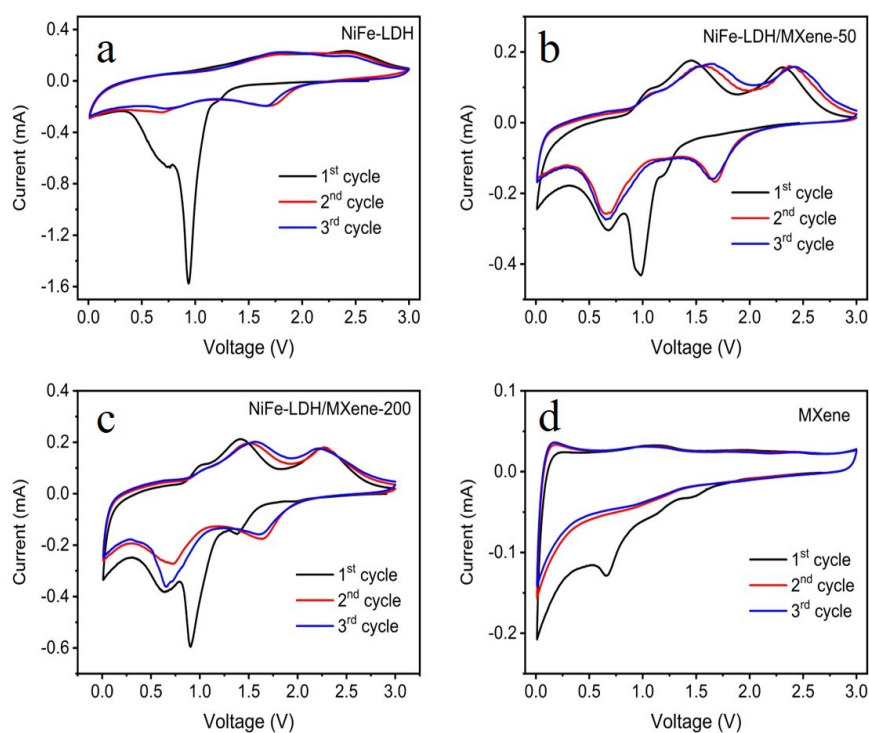

**Figure S4.** CV curves at a scan rate of  $0.2 \text{ mV s}^{-1}$  for (a) NiFe-LDH, (b) NiFe-LDH/MXene-50, (c) NiFe-LDH/MXene-200 and (d) MXene.

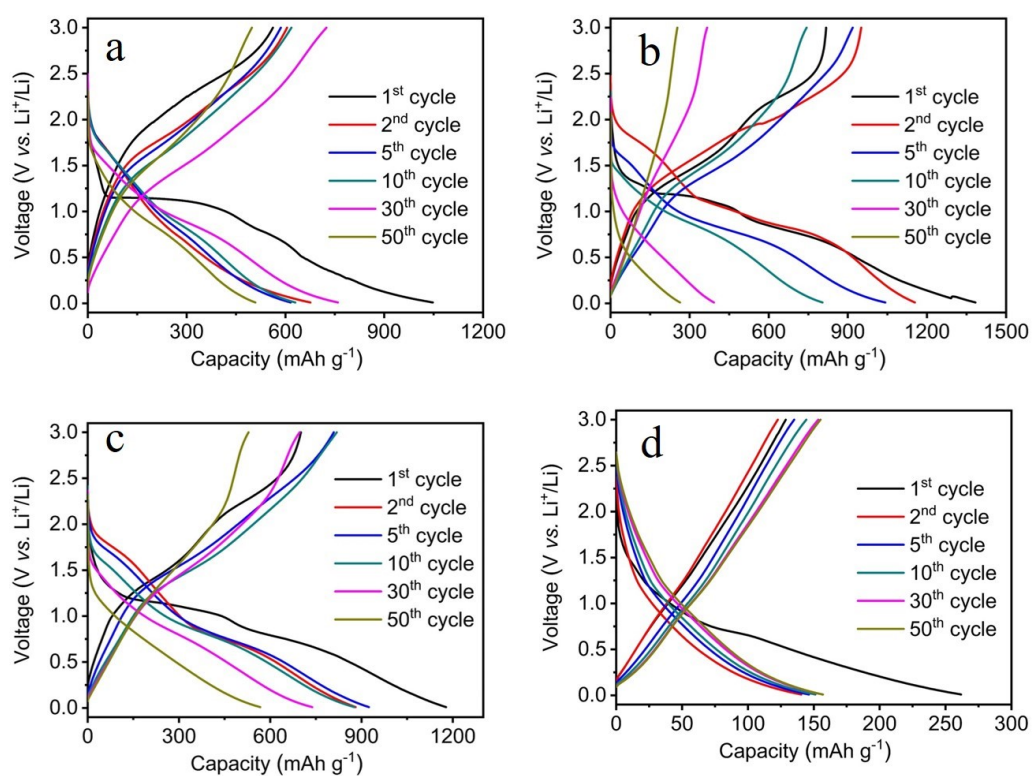

**Figure S5.** GCD profiles of (a) NiFe-LDH, (b) NiFe-LDH/MXene-50, (c) NiFe-LDH/Mxene-200, (d) MXene.

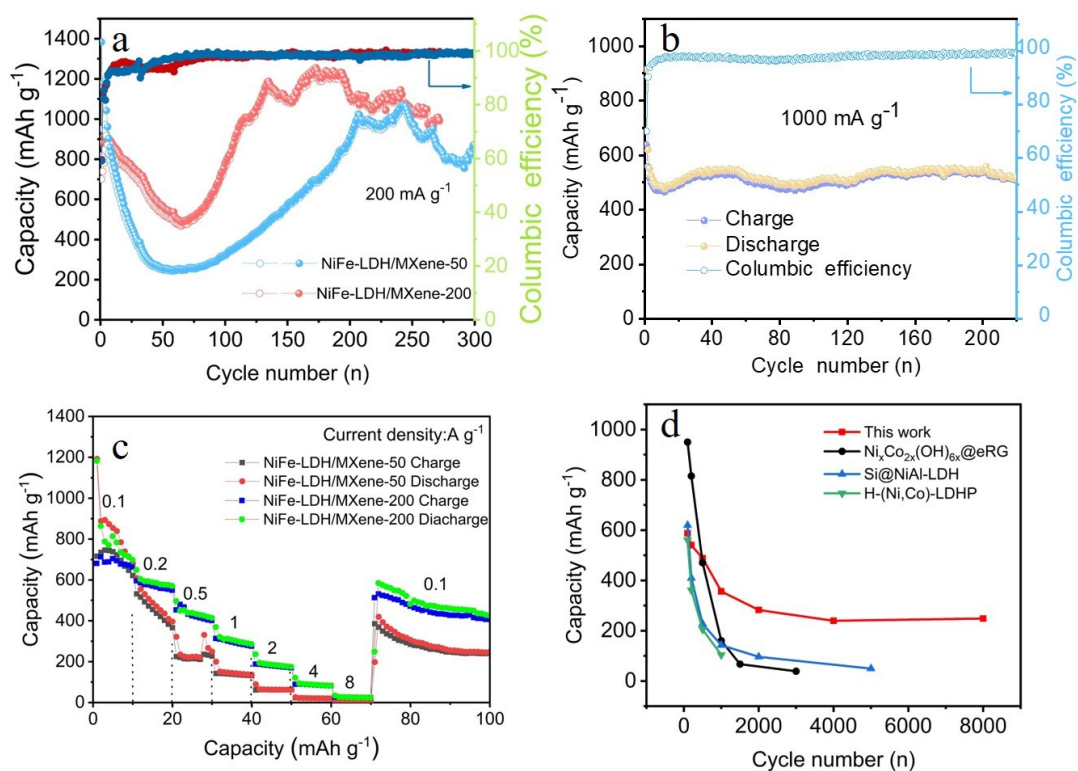

**Figure S6.** (a) Comparison of cyclability of the NiFe-LDH and MXene at 200 mA g<sup>-1</sup>. (b) Cycling performance of the NiFe-LDH/MXene-500 electrode at 1000 mA g<sup>-1</sup>. (c) Comparison of rate capacity of the NiFe-LDH/MXene hybrid materials. (d) Comparisons in the rate capabilities between this work and other LDH-based electrodes.

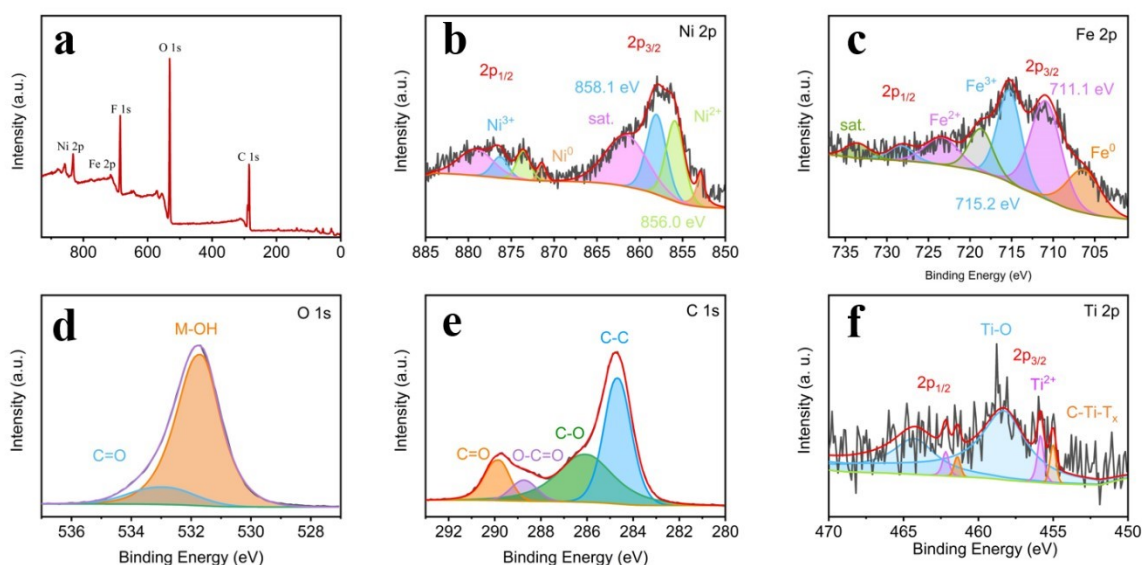

**Figure S7.** XPS spectra of (a) survey scan; (b-c) Fe 2p, and Ni 2p of NiFe-LDH/MXene hybrid materials and NiFe-LDH; and (d) Ti 2p of NiFe-LDH/MXene-500 electrodes after 50 cycles.

**Table S2.** Comparison of electrochemical performance of LDH-based materials in LIBs.

| Materials                                                | Cycling performance (mAh g <sup>-1</sup> at A g <sup>-1</sup> ) | Rate performance (mAh g <sup>-1</sup> at A g <sup>-1</sup> ) | Ref. |
|----------------------------------------------------------|-----------------------------------------------------------------|--------------------------------------------------------------|------|
| Ni <sub>x</sub> Co <sub>2x</sub> (OH) <sub>6x</sub> @eRG | 373.0 at 1 (500 cycles)                                         | 950.0 at 0.1, 160.0 at 1                                     | 1    |
| Si@NiAl-LDH                                              | 534.0 at 0.05 (60 cycles)                                       | 619.5 at 0.1, 142.3 at 1                                     | 2    |
| H-(Ni,Co)-LDHP                                           | 355.4 at 0.1 (50 cycles)                                        | 560.3 at 0.1, 103.6 at 1                                     | 3    |

## Reference



- [1] J. Shi, N. Du, W. Zheng, X. Li, Y. Dai, G. He, Ultrathin Ni-Co double hydroxide nanosheets with conformal graphene coating for highly active oxygen evolution reaction and lithium ion battery anode materials, *Chem. Eng. J.*, 327 (2017) 9-17.
- [2] Q. Li, Y. Wang, B. Lu, J. Yu, M. Yuan, Q. Tan, Z. Zhong, F. Su, Hollow core-shell structured Si@NiAl-LDH composite as high-performance anode material in lithium-ion batteries, *Electrochim. Acta*, 331 (2020) 135331.
- [3] Y. Lu, Y. Du, H. Li, Template-sacrificing synthesis of Ni-Co layered double hydroxides polyhedron as advanced anode for lithium ions battery, *Front. Chem.*, 8 (2020) 581653.
